# Supplementary material for: Self-compassion, sleep quality and psychological well-being in type 2 diabetes: a cross-sectional study
Source: PubMed Central journal article supplement — BMJ Open Diabetes Res Care. 2022 Sep 28;10(5):e002927. doi: 10.1136/bmjdrc-2022-002927 (PMC9528571; doi:10.1136/bmjdrc-2022-002927), 2022-09-28
Supplement: bmjdrc-2022-002927supp001.pdf [file bmjdrc-2022-002927supp001.pdf]

| Model | Variable (X)        | Direct effect of 'X' on daytime sleepiness (Mediator)          | Direct effect of daytime sleepiness (Mediator) on DDS (Outcome) | Direct effect of 'X' on DDS (Outcome)                      | Indirect effect of 'X' on DDS (Outcome)        | Finding                                                                         |
|-------|---------------------|----------------------------------------------------------------|-----------------------------------------------------------------|------------------------------------------------------------|------------------------------------------------|---------------------------------------------------------------------------------|
| 1.    | SCS Total           | b = -1.65<br>SE = .30,<br>p < .001<br>95% CI<br>[-2.24, -1.05] | b = .04<br>SE = .01<br>p < .001<br>95% CI<br>[.03, .06]         | b = -.51<br>SE = .06<br>p < .001<br>95% CI<br>[-.62, -.40] | b = -.07<br>SE = .03<br>95% CI<br>[-.13, -.03] | SCS Total has a negative direct path, and a negative indirect path on DDS       |
| 2.    | SCS Self-kindness   | b = -.33<br>SE = .21<br>p = .116<br>95% CI<br>[-.74, .08]      | b = .06<br>SE = .01<br>p < .001<br>95% CI<br>[.04, .08]         | b = -.04<br>SE = .04<br>p = .339<br>95% CI<br>[-.12, .04]  | b = -.02<br>SE = .02<br>95% CI<br>[-.05, .01]  | SCS Self-kindness has neither a direct or indirect path on DDS                  |
| 3.    | SCS Self-judgement  | b = 1.01<br>SE = .19<br>p < .001<br>95% CI<br>[.63, 1.39]      | b = .04<br>SE = .01<br>p < .001<br>95% CI<br>[.02, .06]         | b = .42<br>SE = .03<br>p < .001<br>95% CI<br>[.35, .49]    | b = .04<br>SE = .01<br>95% CI<br>[.02, .07]    | SCS Self-judgement has a positive direct and indirect path on DDS               |
| 4.    | SCS Common Humanity | b = .14<br>SE = .18<br>p = .427<br>95% CI<br>[-.21, .49]       | b = .06<br>SE = .01<br>p < .001<br>95% CI<br>[.04, .08]         | b = .11<br>SE = .03<br>p = .001<br>95% CI<br>[.04, .18]    | b = .01<br>SE = .01<br>95% CI<br>[-.01, .03]   | SCS Common Humanity has a direct positive path, but not an indirect path on DDS |
| 5.    | SCS Isolation       | b = 1.17<br>SE = .18<br>p < .001<br>95% CI<br>[.82, 1.52]      | b = .03<br>SE = .01<br>p < .001<br>95% CI<br>[.02, .05]         | b = .43<br>SE = .03<br>p < .001<br>95% CI<br>[.37, .49]    | b = .04<br>SE = .01<br>95% CI<br>[.01, .07]    | SCS Isolation has a positive direct and indirect path on DDS                    |
| 6.    | SCS Mindfulness     | b = -.40<br>SE = .20<br>p = .048<br>95% CI<br>[-.79, -.004]    | b = .06<br>SE = .01<br>p < .001<br>95% CI<br>[.04, .08]         | b = -.01<br>SE = .04<br>p = .717<br>95% CI<br>[-.09, .06]  | b = -.02<br>SE = .01<br>95% CI<br>[-.06, .001] | SCS Mindfulness has neither a direct or indirect path on DDS                    |
| 7.    | SCS Over-identified | b = 1.18<br>SE = .19<br>p < .001<br>95% CI<br>[.81, 1.56]      | b = .03<br>SE = .01<br>p < .001<br>95% CI<br>[.02, .05]         | b = .46<br>SE = .03<br>p < .001<br>95% CI<br>[.39, .52]    | b = .04<br>SE = .01<br>95% CI<br>[.01, .07]    | SCS Over-identified has a positive direct and indirect path on DDS              |

DDS = Diabetes Distress Scale; SCS = Self Compassion Scale

### S1 Supplementary table.

Mediation analysis outcomes.
